# Supplementary material for: Gold nanoparticle amplification strategies for multiplex SPRi-based immunosensing of human pancreatic islet hormones
Source: Royal Society of Chemistry journal article supplement (doi:10.1039/c9an00140a), 2019-01-01
Supplement: c9an00140a1.pdf [file c9an00140a1.pdf]

## Gold nanoparticle amplification strategies for multiplex SPRI-based immunosensing of human pancreatic islet hormones

F. Rafael. Castiello<sup>a</sup> and Maryam Tabrizian<sup>a,b</sup>

<sup>a</sup> Biomedical and Biological Engineering Department, McGill University, Montreal, QC, Canada.

<sup>b</sup> Faculty of Dentistry, McGill University, Montreal, QC, Canada.

### Atomic Force Microscopy

Atomic force microscopy (AFM) measurements were performed using a Nanoscope III instrument (Digital Instruments, USA) and Nanoscope v 5.12r5 software. AFM images were acquired in tapping mode in air at room temperature with a silicon probe having a nominal spring constant of 42 N/m and a nominal resonance frequency 330 kHz (model PPP-NCHR, NANOSENSORSTM).

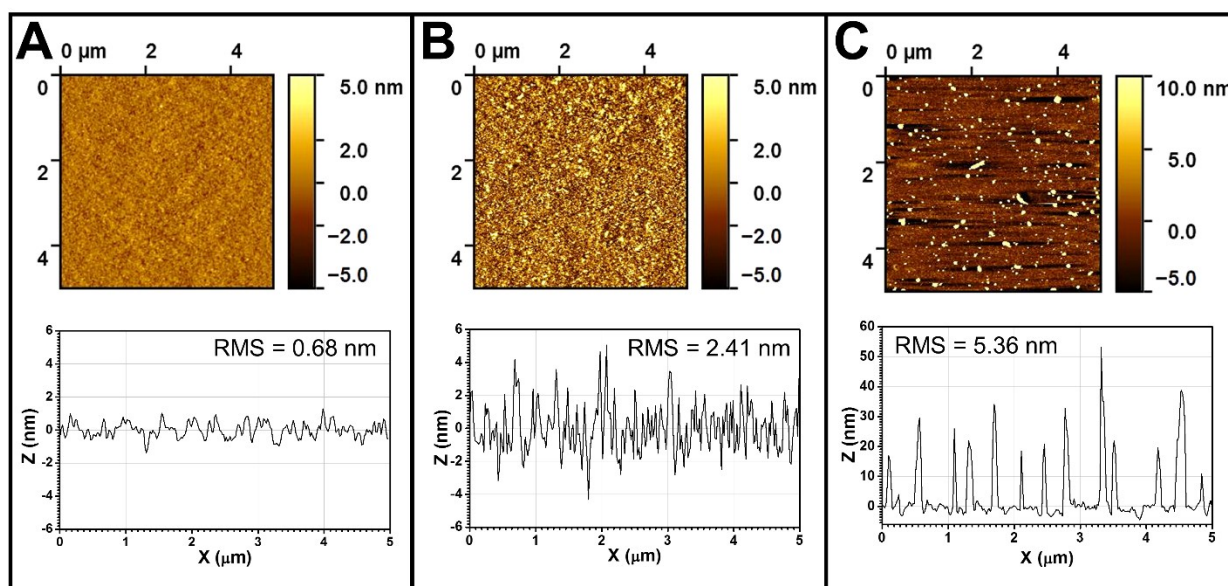

**Figure S1.** 2D AFM images and surface topography of: A) a clean gold surface, B) a gold surface functionalized with a self-assembled monolayer (SAM) of hexa(ethylene glycol) dithiol and C) a gold-SAM functionalized surface with gold nanoparticles.

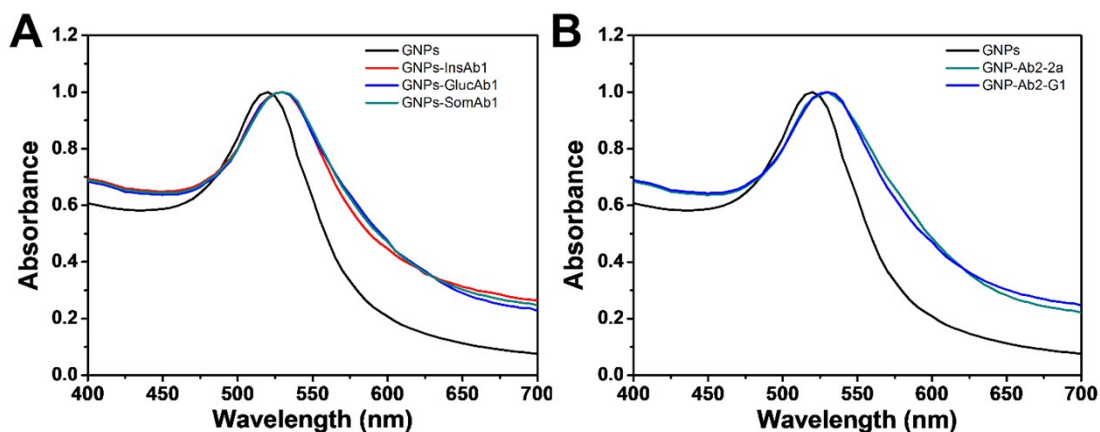

**Figure S2.** UV-vis absorption spectra of functionalized gold nanoparticles with: A) primary antibodies and B) secondary antibodies.

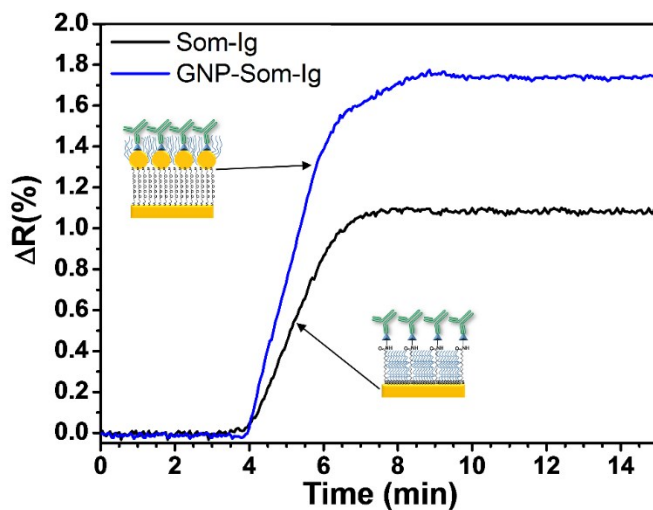

**Figure S3.** Real-time SPR angle shift sensorgrams comparison in response to the injection of 2 $\mu$ g/mL of anti-somatostatin antibody for a surface functionalized with gold nanoparticles and a surface without gold nanoparticles.

**Table S1.** Quantification of non-specific absorption of 1 mg/mL of BSA or LYZ on the sensor's surface during multiplexed analysis. Quantification was performed for two negative control: the bare SAM surface and spots functionalized with BSA (control). This calculation assume that 1RU = 1RIU = 1pg/mm<sup>2</sup> of surface mass shift at a fixed wavelength of 800 nm. Only LYZ is reported in pg/mm<sup>2</sup> since it produced the largest sensor response.

| Spot         | $\Delta R$ (%) BSA [1mg/mL] | $\Delta R$ (%) LYZ [1mg/mL] | Amount of LYZ absorbed (pg/mm <sup>2</sup> ) |
|--------------|-----------------------------|-----------------------------|----------------------------------------------|
| Insulin      | 0.04 $\pm$ 0.02             | 0.15 $\pm$ 0.02             | 90 $\pm$ 12                                  |
| Glucagon     | 0.04 $\pm$ 0.01             | 0.11 $\pm$ 0.03             | 66 $\pm$ 18                                  |
| Somatostatin | 0.04 $\pm$ 0.02             | 0.16 $\pm$ 0.03             | 96 $\pm$ 18                                  |
| Surface      | 0.06 $\pm$ 0.01             | 0.16 $\pm$ 0.04             | 96 $\pm$ 24                                  |
| Control      | 0.03 $\pm$ 0.02             | 0.07 $\pm$ 0.04             | 42 $\pm$ 24                                  |
